1 ***GsERF* enhances aluminum tolerance through an ethylene-mediated**  
2 **pathway in *Arabidopsis thaliana***

3 **Lu Li<sup>1,2,3,4†</sup>, Xingang Li<sup>1,2,3,4†</sup>, Ce Yang<sup>1,2,3,4</sup>, Yanbo Cheng<sup>1,2,3,4</sup>, Zhandong Cai<sup>1,2,3,4</sup>, Hai**  
4 **Nian<sup>1,2,3,4\*</sup> and Qibin Ma<sup>1,2,3,4\*</sup>**

5 <sup>1</sup>The State Key Laboratory for Conservation and Utilization of Subtropical Agro-bioresources, South  
6 China Agricultural University, Guangzhou, Guangdong 510642, P.R. China.

7 <sup>2</sup>The Key Laboratory of Plant Molecular Breeding of Guangdong Province, College of Agriculture,  
8 South China Agricultural University, Guangzhou, Guangdong 510642, P.R. China.

9 <sup>3</sup>The Guangdong Subcenter of the National Center for Soybean Improvement, College of Agriculture,  
10 South China Agricultural University, Guangzhou, Guangdong 510642, P.R. China.

11 <sup>4</sup>The Guangdong Provincial Laboratory of Lingnan Modern Agricultural Science and Technology,  
12 South China Agricultural University, Guangzhou, Guangdong 510642, P.R. China.

13 <sup>†</sup>These authors contributed equally to this work.

14 \*Correspondence: College of Agriculture, South China Agricultural University; e-mail:  
15 [maqibin@scau.edu.cn](mailto:maqibin@scau.edu.cn); [hnian@scau.edu.cn](mailto:hnian@scau.edu.cn); Tel./Fax: 86-20-85288024.

16

## 17 **Abstract**

18 The ethylene response factor (ERF) transcription factor is a subfamily of AP2/ERF superfamily in plants, which  
19 plays multiple roles in plant growth and development as well as stress response. In this study, we found that the  
20 *GsERF* gene from BW69 line of wild soybean held a constitutive expression pattern and induced by aluminum  
21 stress with more transcripts in soybean root. The putative GsERF protein containing an AP2 domain was in the  
22 nucleus and transactivation activity. In addition, the overexpression of the *GsERF* gene enhanced root relative  
23 length rate in *Arabidopsis* and shallow staining by hematoxylin under the treatments of AlCl<sub>3</sub>. The ethylene  
24 synthesis related genes such as *ACS4*, *ACS5* and *ACS6* are upregulated in the *GsERF* overexpressed plants than  
25 those in wild type plants under the treatment of AlCl<sub>3</sub>. Furthermore, expression levels of stress/ABA-responsive  
26 marker genes, including *ABI1*, *ABI2*, *ABI4*, *ABI5*, *RD29B* and *RD22* in transgenic lines compared with those in  
27 wild type *Arabidopsis* were affected by AlCl<sub>3</sub> treatments. Taken together, the results indicate that overexpression  
28 of *GsERF* may enhance aluminum tolerance through an ethylene-mediated pathway and/or ABA signaling  
29 pathway in *Arabidopsis thaliana*.

30 **Key words:** AP2/ERF family, *GsERF*, Transcription factor, ET, aluminum stress, ACS

## 31 **INTRODUCTION**

32 The toxicity of aluminum (Al) is a major limiting factor for crop production in acidic soils, which account  
33 for about 50% of the world's arable land (Uexküll *et al.*, 1995). When the pH value of soil is lower than 5.0,  
34 aluminum will exist in the form of ions, and Al<sup>3+</sup> will dissolve into the soil which will strongly inhibit root  
35 growth and function, thus reduce crop yield (Kochian, 1995). Within a species, plant species and varieties vary  
36 widely in their ability to tolerate aluminum toxicity. Some plant species or varieties have evolved high levels of  
37 tolerance mechanisms in order to survive in acidic soils. Wild soybean in South China has been growing in acid  
38 soil for a long time and there is no lack of tolerance resources, which plays an important role in improving the  
39 stress resistance of soybean (Zeng *et al.*, 2012).

40 ERF transcription factor (ethylene response factor) is a subfamily of AP2/ERF superfamily, which can be  
41 divided into three categories according to the number of AP2/ERF domains: AP2, ERF and RAV (Zhang *et al.*,  
42 2008). The ERF family of proteins contains an AP2/ERF domain consisting of a highly conserved 58-60 amino  
43 acids that binds to multiple cis-acting elements, including GCC box and DRE/CRT, etc (Ohme-Takagi *et al.*,

44 1995; Liu *et al.*, 1998). This domain is the main functional region of ERF family genes (Riechmann *et al.*,  
45 1998). It is found that ethylene response factors (ERF) not only play an important role in plant growth and  
46 development, but also play a very important role in plant response to stress (Riechmann *et al.*, 1998). Previous  
47 studies have shown that ERF family genes are involved in plant growth and development in rice, Arabidopsis  
48 and other plants. Such as OsERF1 is constitutively expressed in different organs of rice, and is upregulated by  
49 ethylene, overexpression of *OsERF1* in *Arabidopsis thaliana* promotes the expression of ethylene responsive  
50 gene *PDF1.2* and b-chitinase, and significantly affects the growth and development of transgenic Arabidopsis  
51 (Hu *et al.*, 2008). AtERF71/HRE2 can activate the expression of downstream genes by binding with GCC box  
52 and DRE/CRT, regulate the expansion of root cells and play an important role in root development (Lee *et al.*,  
53 2015). Julien Pirrello found that overexpression of *Sl-ERF2* gene in transgenic tomato lines can lead to early  
54 seed germination and enhanced hook formation in dark growth seedlings. Recently, the transcription factor  
55 ERF139 was found in poplar to regulate the expansion of xylem cells and the deposition of secondary cell walls  
56 (Wessels *et al.*, 2019).

57 In recent years, more and more ERF family genes are found to function in stress tolerance in plants. Under  
58 drought stress, it was found that overexpressing rice genes *OsERF71*, *OsERF101* and *OsERF48* can enhance  
59 drought resistance of rice (Jin *et al.*, 2018; Jung *et al.*, 2017; Li *et al.*, 2018). Heterologous overexpression of  
60 soybean gene *GmERF3* can enhance tobacco drought resistance (Zhang *et al.*, 2009). Overexpressed *AtERF019*  
61 can enhance drought resistance in Arabidopsis (Scarpeci *et al.*, 2016). Under salt stress, allogeneic  
62 overexpression of *GmERF135* in Arabidopsis can enhance the salt tolerance of Arabidopsis plants. Meanwhile,  
63 *GmERF135* can promote the growth of transgenic hairy roots under salt stress (Zhao *et al.*, 2019). In wheat,  
64 overexpression of ERF1-V can enhance the salt tolerance of wheat, and heterologous overexpression of  
65 *GmERF7* can enhance the salt tolerance of tobacco (Zhai *et al.*, 2013; Xing *et al.*, 2017). Under alkaline  
66 stress conditions, heterologous overexpression in Arabidopsis thaliana, *GsERF71* and *GsERF6* from wild  
67 soybeans, and *VaERF3* from red beans, could enhance the resistance of Arabidopsis to alkali stress (Li *et al.*,  
68 2020; Yu *et al.*, 2017; Yu *et al.*, 2016). Overexpression of ZmEREB180 in maize can enhance maize flood  
69 tolerance (Yu *et al.*, 2019). Heterologous overexpression of *VaERF092* and *ERF105* enhanced Arabidopsis cold  
70 tolerance (Bolt *et al.*, 2017; Sun *et al.*, 2019). Overexpression of *GmERF75* in Arabidopsis can enhance osmotic  
71 stress tolerance of Arabidopsis, and *GmERF75* can promote osmotic stress tolerance in transgenic hairy roots

72 (Zhao *et al.*, 2019). In addition, ERF genes can also enhance plant resistance to pathogens. *AtERF14* was found  
73 in regulating plant defense response (Oñate-Sánchez *et al.*, 2007). In Arabidopsis, *ERF11* and *ERF15* can  
74 positively regulate immunity to *Pseudomonas syringae* (Zhang, 2015; Zheng *et al.*, 2019). In soybean,  
75 *GmERF13* and *GmERF5* can enhance the resistance to *Phytophthora sojae* (Zhao *et al.*, 2017; Dong *et al.*,  
76 2015).

77 However, no ERF family gene has been reported to be involved in the response of plants to acid-tolerant  
78 aluminum stress. In this study, qRT-PCR analysis showed that aluminum could rapidly induce the expression of  
79 *GsERF* gene in wild soybean, and *GsERF* gene showed a constitutive expression pattern in wild soybean, which  
80 was expressed in soybean leaves more than that in root, but the expression level of *GsERF* gene in soybean root  
81 tip was the highest under the condition of aluminum stress. This discovery prompted us to further explore the  
82 response mechanism of *GsERF* gene to aluminum stress.

## 83 **RESULTS**

### 84 **Isolation and sequence analysis of *GsERF* gene**

85 In this study, the full-length cDNA sequence of *GsERF* gene was cloned from the BW69 line of *Glycine*  
86 *soja* which is tolerant to Al toxicity. The primers were designed according to the *GsERF* homologue gene in  
87 *Glycine max*, *Glyma09g52900*. The *GsERF* gene contains a complete open reading frame (ORF) of 369 bp  
88 which is 99 % identical to *Glyma09g52900* based on the genome database from Phytozome, and encodes a  
89 protein of 123 amino acids. The predicted GsERF protein contained a conserved DNA-binding domain  
90 (AP2/ERF domain) of 58 amino acids which is reported to be the primary functional area. Alignment analysis  
91 revealed that GsERF was 68% to 97% similar to other homologous genes in domain ratio (Fig.1). The analysis  
92 of ERF gene family indicated that GsERF is a member of B-2 subgroup members (Zhang *et al.*, 2008). A number  
93 of ERF family genes have been reported to have related functions, many of them can play a role in the plant in  
94 the face of biotic and abiotic stress. Through phylogenetic tree analysis, we found that GsERF and GmERF5  
95 are closely related in the same branch (Fig.2).

### 96 ***GsERF* expression pattern analysis**

97 Quantitative real-time PCR (qRT-PCR) was performed to assess the transcript levels of *GsERF* in BW69  
98 plants. The qRT-PCR results showed that *GsERF* was a constitutive expression pattern rich in roots, stems and

99 leaves. Under the condition of aluminum stress, the expression level of *GsERF* in roots, stems and leaves was  
100 significantly increased, especially at the root tip of 1cm with the expression levels of 13 times (Fig.3C). Under  
101 the treatments of different aluminum concentrations time courses, the results showed that *GsERF* could be  
102 rapidly induced by aluminum stress, and the transcripts of *GsERF* reached a maximum level at 4 h, and then the  
103 mRNA transcripts of *GsERF* begin to decline (Fig.3A). Under the treatments of different aluminum  
104 concentrations, the *GsERF* transcripts increased with  $\text{AlCl}_3$  concentrations, and when the concentration of  $\text{AlCl}_3$   
105 was 100  $\mu\text{M}$ , the level of *GsERF* mRNA was 25 times that of the control (Fig.3B).

### 106 **GsERF is a nuclear protein with transactivation activity**

107 To determine the cellular localization of GsERF protein, its localization was analysed by expressing a gene  
108 encoding a GsERF–eGFP fusion protein under the control of the CaMV35S promoter in tobacco epidermal cells.  
109 The empty vector (PCAMBIA1302-eGFP) was used as the control. As shown in Fig.4A, the eGFP protein was  
110 distributed in the whole cells, while the GsERF1-eGFP fusion protein was only visualized in the cell nuclei. The  
111 results clearly indicated that GmERF5 is a nuclear-localized protein.

112 To determine whether GsERF could act as a transcriptional activator, the yeast two-hybrid analysis was  
113 used. Full-length of *GsERF* gene were fused with the GAL4 DNA-binding domain and then expressed in yeast  
114 strain Y2H gold to identify the transcriptional activation activity by growing the yeast cells on control plates  
115 (SD/-Trp) or selective plates (SD/-Trp +X- $\alpha$ -gal). Yeast cells containing only the pGBKT7 plasmid of GAL4  
116 DNA binding domain were used as the negative control. The results showed that only yeast colonies carrying  
117 GsERF could activate the expression of reporter gene and make the colonies blue on the selective plate (Fig.4B).

### 118 **Overexpression of *GsERF* enhanced plant Al tolerance**

119 To investigate the effect of *GsERF* under aluminum stress, GsERF was overexpressed in Arabidopsis to  
120 obtain the transgenic lines (Fig.S1). Then, three homozygous lines with high expression were selected for the  
121 phenotype identification. Under the treatment of  $\text{AlCl}_3$ , the growth of *GsERF* transgenic plants and WT plants  
122 were significantly inhibited, but root growth of *GsERF* overexpression (OX) lines was less inhibited than that  
123 of WT plants. The statistical results also showed that the relative root elongation of *GsERF* transgenic plants  
124 was significantly higher than that of WT plants (Fig.5A&B). The proline content of transgenic plants and wild-  
125 type plants increased after aluminum treatment, but the proline content in *GsERF* transgenic plants was much

126 higher than that of wild-type plants (Fig.5C).

127 In order to verify the role of *GsERF* in soybean, we obtained overexpressed and RNAi interfering hair root  
128 lines through soybean hairy root transformation. We detected that *GsERF* mRNA levels were 38 times higher  
129 in overexpressing lines than those of WT. However, *GsERF* mRNA levels were 80 percent lower in RNAi lines  
130 than that of WT (Fig.6A). To detect the dying of hairy roots, the hairy roots of Arabidopsis were stained with  
131 hematoxylin when they were treated in the solution containing 50  $\mu$ M  $AlCl_3$  for 6 hours. The staining results  
132 showed that the hairy roots in control were stronger than those in OX-*GsERF* transgenic lines, and weaker than  
133 those in RNAi-*GsERF* transgenic lines (Fig.6B). The results indicated that the binding amount of  $Al^{3+}$  in hairy  
134 roots is the least in OX-*GsERF* lines, while the binding amount of  $Al^{3+}$  in hairy roots is the most in RNAi-  
135 *GsERF* lines. Taken together, these results suggested that *GsERF* overexpression can enhance the tolerance of  
136 Arabidopsis and soybean to aluminum stress.

### 137 ***GsERF* enhances aluminum tolerance through an ethylene-mediated pathway**

138 To understand the molecular mechanism of *GsERF* tolerant to Al stress, some genes from ERF family  
139 members were carried out to investigate their responses to Al stress and ACC (ethylene precursor) content was  
140 determined in Arabidopsis. On the base of *GsERF* expression up-regulated by ethylene (ET) (Fig. S2), we  
141 examined the changes of ACC (ethylene precursor) content in *GsERF* overexpression (OX) lines and wild type  
142 (WT) in Arabidopsis after aluminum treatment 10 days. We found that the content of ACC in *GsERF*  
143 overexpression plants after aluminum treatment was higher than that of wild-type plants, while there was a little  
144 difference in ACC content between wild type plants and overexpressed plants without aluminum treatment  
145 (Fig.7A). These results suggested that ET signal transduction may be involved in the aluminum-tolerant  
146 pathway induced by *GsERF* gene. To further confirm this hypothesis, we analyzed the transcription levels of  
147 genes associated with ET synthesis related genes. the qRT-PCR results showed that the expression levels of  
148 *ACS4*, *ACS5* and *ACS6* genes related to ethylene synthesis was significantly increased in the *GsERF*  
149 overexpressed plants than those in wild type plants under the treatment of  $AlCl_3$  (Fig. 7B, C&D).

## 150 **DISCUSSION**

151 Aluminum toxicity has a great influence on the root of crops, which will directly affect the yield of crops.  
152 Therefore, it is important in theory and practice to find new aluminum tolerance genes and determine their

153 functions. AP2/ERF family is one of the largest families of plant transcription factors, whose members are  
154 involved in many aspects of plant development and respond to many environmental stresses (Klay *et al.*, 2018).  
155 In this study, *GsERF* gene encoding an ERF transcription factor was isolated from gene expression profile  
156 resistant to aluminum stress using wild soybean BW69 line (Zeng *et al.*, 2012) . Sequence analysis showed  
157 that GsERF protein has a highly conserved AP2 domain with typical characteristic of the b-3 subgroup of the  
158 ERF superfamily (Fig.1) (Zhang *et al.*, 2008). Furthermore, GsERF protein localizes in the nucleus and has a  
159 characteristic of self-activation activity like many other ERF transcription factors (Fig.4). We speculated that  
160 may GsERF protein as a transcription factor hold the potential functions of ERF family members.

161 According to previous studies, members of the AP2/ERF family have important functions in plants facing  
162 various environments, different growth and development stages. For example, members of the B-3 subgroup,  
163 where *OsERF48* can enhance the tolerance of plants to drought and salt stresses (Jung *et al.*, 2017), *AtERF15*  
164 can enhance the positive regulation of the immune response in Arabidopsis (Zhang, 2015), and *AtERF096* can  
165 reduce the water loss rate in Arabidopsis (Wang *et al.*, 2015), NtERF5 enhances resistance to tobacco Mosaic  
166 virus, and *GsERF6* regulates plant tolerance to bicarbonate in Arabidopsis (Yu *et al.*, 2016). In addition, the  
167 ERF genes also play a key role in plant growth and development. For example, *MdERF1B* can regulate the  
168 biosynthesis of apple anthocyanin and procyanidins (Zhang *et al.*, 2018), and *OsERF1* significantly affects the  
169 growth and development of transgenic Arabidopsis (Hu *et al.*, 2008). However, no ERF family genes have been  
170 reported to be involved in the response to Al stress in plants. In present study, *GsERF* with a constitutive  
171 expression pattern was rapidly induced by aluminum stress with richest transcripts under AlCl<sub>3</sub> treatment (Fig.3).  
172 This result suggested *GsERF* may play certain role in aluminum stress.

173 In order to verify whether the gene GsERF has the function of acid-tolerant aluminum, we induced soybean  
174 hairy root transformation and heterologous transformation of Arabidopsis thaliana, combining the colorimetric  
175 properties of hematoxylin, hematoxylin and bluish-purple when complexed with Al, therefore, visual evaluation  
176 of stained roots can be used to detect the accumulation of Al in root tissues. In recent years, there have been  
177 more and more reports using soybean hairy root transformation to verify the function of soybean aluminum  
178 tolerance genes. Among them, GmME1-OE hairy root tip hematoxylin staining is lighter and the aluminum  
179 content is lower, indicating that aluminum resistance is stronger. The hairy roots overexpressing GmGRPL had  
180 obvious aluminum resistance than the control. Under aluminum stress, the aluminum content in the hairy roots



181 overexpressing GmGRPL was lower than that of the control, and the hairy roots overexpressing GmGRPL had  
182 higher antioxidant capacity. In our study, we found that after culturing in the presence of aluminum, after  
183 hematoxylin staining, the hairy roots of the overexpressed lines were lighter than the root tips of the control  
184 lines, and the control lines were stained more than the interference lines. Light, which means that the GsERF  
185 overexpression hairy root tip aluminum content is lower than the control, and the color of the root tip Al  
186 complexed with hematoxylin is lighter. Previous studies have shown that root tip elongation is inhibited when  
187 plants are subjected to aluminum stress, so root tip elongation is one of the indicators of aluminum tolerance  
188 (Wang *et al.*, 2006). Similarly, in GsERF transgenic *Arabidopsis thaliana*, we found that the relative root  
189 elongation of transgenic lines was significantly greater than that of the wild type in the presence of aluminum,  
190 and the proline content of transgenic plants was higher than that of the wild type after aluminum treatment.  
191 Known research results indicate that the plant's proline content will increase under stress, and a large amount of  
192 accumulated proline will help the plant reduce the damage caused by stress. Combined with our experimental  
193 results, GsERF gene can enhance the tolerance of transgenic *Arabidopsis* to aluminum stress. However, in our  
194 study, we found that when GsERF overexpressing plants were subjected to aluminum stress, they produced  
195 more ethylene than wild-type plants, and the ethylene synthesis related gene *ASC4*, *ASC5* and *ASC6* expression  
196 levels increased. The results were similar to those found in other studies, which found that *ASC1*, *ASC2*, and  
197 *ASC5* genes associated with ethylene synthesis increased in  $\text{NaHCO}_3$  stress in GmERF7 overexpressed lines  
198 (Yu *et al.*, 2016). In addition, protein phosphatase 2A can reduce the toxicity of cadmium by regulating  
199 ethylene production in *Arabidopsis*, among which *ASC2* and *ASC6* are found to be up-regulated under cadmium  
200 stress (Chen *et al.*, 2020). According to previous studies, plant hormones are involved in the response to stress.  
201 When plants are under stress, various hormones in the body will react, and different hormones may interact to  
202 form a network of mutual exchanges to resist external pressure (Ku *et al.*, 2018). In this study, the ethylene  
203 synthesis related genes such as *ASC4*, *ASC5* and *ASC6* were induced with much higher levels by *GsERF* under  
204 aluminum stress (Fig.7). In addition, abscisic acid content were measured to investigate its potential role in  
205 regulating Al stress. The determine results showed that there was a little difference on the ABA content between  
206 *GsERF* overexpressing lines and wild type in *Arabidopsis* plants (Fig.S3). However, some genes involved in  
207 the abscisic acid signaling pathway were found to have changed expression levels in *GsERF* overexpressing  
208 lines (Fig.8). Under aluminum stress, the transcripts of *ABI1* and *ABI2* in *GsERF*-overexpressing lines were



209 significantly lower than those in wild type (Fig.8). Studies have shown that *ABII* and *ABI2* play a key role in  
210 abscisic acid signal transduction and are negative regulators in abscisic acid signal transduction (Seo *et al.*,  
211 2010). While the transcripts of *ABI4* and *ABI5* in *GsERF*-overexpressing lines was higher than those of WT,  
212 which are positive regulators of abscisic acid signal transduction (Finkelstein *et al.*, 2000; Finkelstein *et al.*,  
213 1998). Furthermore, *RD29B* is significantly up-regulated in *GsERF* overexpressed lines (Fig.8). It is well  
214 known that *RD29B* is mainly involved in drought, salt stress and abscisic acid response through independent  
215 abscisic acid pathways resulting in higher permeability and stress tolerance of plants (Msanne *et al.*, 2011;  
216 Shinozaki, 1994). The results suggested that *GsERF* gene may regulate plants tolerant to aluminum stress  
217 through ET pathway and/or the interaction between ethylene and abscisic acid.  
218

## MATERIALS and METHODS

### 219 Plant material and stress treatment

220 The wild soybean seeds from BW69 line were grown in a growth chamber maintained at 28°C /25°C and  
221 70% relative humidity with a 14 h light / 10 h dark cycles. The seeds germinated in vermiculite, then seedlings  
222 of uniform growth were selected and cultured in nutrient solution (pH 5.8) for three days. The solution was  
223 renewed daily. After 3 days, the seedlings were transplanted into 0.5 mM CaCl<sub>2</sub> (pH 4.5) solution were used for  
224 aluminum treatments. For ethylene stress, the hydroponic seedlings were placed in an airtight plexiglass  
225 chamber, and ethylene gas was released after 2 ml 40% ethephon and 1 g NaHCO<sub>3</sub> were dissolved in 200 ml  
226 H<sub>2</sub>O (Zhang *et al.*, 2009) .

227 The Arabidopsis ecotype Columbia (Col-0) seeds were germinated and grown in the growth chamber with  
228 following conditions: 22-24°C, 60% relative humidity, 100 mol photons m<sup>-2</sup>s<sup>-1</sup> 16 h light and 8 h dark cycles.  
229 Seeds are planted on demand on vegetative soil, from germination to harvest. For the analysis of gene expression  
230 of Arabidopsis thaliana, seeds were planted on 1/2 MS agar plates in darkness for 4 days at 4 °C, and then placed  
231 in the growth chamber. Then, seedlings in root length 1cm were to 1/2 MS solid medium in the absence or  
232 presence of AlCl<sub>3</sub>. After 10 days, the whole plants were collected as samples, and each sample contained at least  
233 10 plants.

### 234 RNA isolation, cDNA synthesis and quantitative real-time PCR

235 Total RNA was isolated using TRIzol (Tiangen Biotech, Beijing, China) and cDNA syntheses were

236 performed by PrimeScript RT reagent kit (Takara). The qRT-PCR analyses were performed using SYBR Premix  
237 ExTaq TM II Mix (TaKaRa, Shiga, Japan). *Actin3* (GenBank accession no.) was used as reference in wild  
238 soybean. The Arabidopsis housekeeping gene *actin* (GenBank accession no.) was used as reference in  
239 Arabidopsis. The data were analyzed with the  $2^{-\Delta\Delta CT}$  method (Livak *et al.*, 2001) . The primers used for qRT  
240 PCR were listed in Supplementary Table S1.

## 241 **GsERF gene isolation and sequence analysis**

242 The *GsERF* gene was isolated from the wild soybean BW69 line. The full sequence of *GsERF* was  
243 amplified by PCR primer pairs 5' - GGATCACGCCTCAAGTT -3' and 5'- CGAACCCTAAATCATCAG -3'.  
244 The PCR products were inserted into the multiple cloning site of the pLB vector (Tiangen Biotech, Beijing,  
245 China) and sent for sequencing. Multiple alignments of sequences analysis were performed using DNAMAN  
246 software. Homology analysis of *GsERF* and the other 44 reference ERF superfamily genes were performed  
247 using MAGE6.0 software by a neighbor-joining method. The amino acid sequences were obtained from  
248 GenBank (<http://www.ncbi.nlm.nih.gov/genbank/>) or Phytozome (<http://phytozome.jgi.doe.gov/pz/portal.html>).

## 249 **Subcellular localization analysis**

250 To analyze subcellular localization of GsERF protein, the full-length of *GsERF* was inserted into the  
251 *NcoI/SpeI* site of pCAMBIA1302 vector to generate GsERF-eGFP construct. The fusion construct  
252 pCAMBIA1302-GsERF-eGFP was transformed into tobacco epidermal cells. After 2-3 days, the green  
253 fluorescence signals in tobacco epidermal cells were observed under the confocal laser-scanning microscope  
254 (SP5, Leica, Wetzlar, Germany)(Sparkes *et al.*, 2006) .

## 255 ***In vitro* transcriptional activation assay**

256 For the transactivation assay, the full-length of *GsERF* was inserted into the *EcoRI/BamHI* sites of  
257 pGBKT7 vector. The constructs of pGBKT7-GsERF were transformed into yeast strain Y2Hgold and grown on  
258 SD/-Trp medium at 30 °C for 3 days. After selection of the yeast transformants carrying the GsERF gene on SD  
259 (-Trp) medium, they were transferred to SD (-Trp, X- $\alpha$ -Gal) medium to identify the transcriptional activation.  
260 The empty plasmid were used as negative control.

## 261 **Arabidopsis transformation and soybean hairy root transformation**

262 The Arabidopsis ecotype Col-0 was used for transformation. With CaMV 35S as the promotor, the full  
263 coding region of *GsERF* was inserted into the plant expression binary vector pTF101.1 to generate pTF101.1-  
264 GsERF. The constructs were transformed to *Agrobacterium tumefaciens* strain GV3101 and then the targeted  
265 gene was transferred into Arabidopsis plants by floral dip method (Clough, 2010).

266 Five-day-old seedlings with unfolded cotyledons were used for soybean hairy root production. For the  
267 RNAi construct, 233 bp of the *GsERF* coding region was cloned and inserted into the pMU103 vector. The  
268 overexpression vector and RNAi interference vector were transferred into *A. rhizogenes* strain K599 and then  
269 transformed by hypocotyl injection (Guo *et al.*, 2011) . The empty plant expression binary vector pTF101.1  
270 were used as control.

## 271 **Hematoxylin staining**

272 The expression of *GsERF* gene in hairy root lines was analyzed, and appropriate hairy root lines were  
273 selected for subsequent experiments. Hairy roots were used for 0, 25  $\mu$ M AlCl<sub>3</sub> treatments (0.5 mM CaCl<sub>2</sub>, pH  
274 4.5) for 6 h. After AlCl<sub>3</sub> treatment, the hairy roots were washed three times with sterilized water and were stained  
275 with hematoxylin dye. The dyed roots were washed in sterile water for half an hour and then observed and  
276 photographed by Leica S8APO stereo microscope (Leica, Germany) (Rincón *et al.*, 1992) .

## 277 **Phenotype analysis of Arabidopsis tolerant to Acidic aluminum stress**

278 To analyze the phenotypes of *GsERF* overexpression (OX) and wild type (WT) Arabidopsis under  
279 aluminum stress, the seeds of T<sub>3</sub> GsERF overexpression and WT were used in this study. The seed surface was  
280 sterilized with 10% sodium hypochlorite for 10 minutes and subsequently washed in deionized water. Then, the  
281 sterilized seeds were grown on 1/2 MS agar plates in darkness for 4 days at 4 °C. Then the plate is cultivated  
282 upright, 22-24°C, 60% relative humidity, 100 mol photons m<sup>-2</sup>s<sup>-1</sup> 16 h light and 8 h dark cycles. Then seedlings  
283 with root length of 1 cm were selected and transferred to 1/2 MS agar medium (pH 4.5) with different AlCl<sub>3</sub>  
284 concentrations. After 10 days, measure the main root length and take pictures with a camera.

## 285 **Physiological indices assay**

286 GsERF overexpression and WT lines were treated with or without aluminum for 10 days, and the whole  
287 plant was selected as a sample. The free proline content was measured as the method described in detail

288 previously (Zhang *et al.*, 2009). Ethylene precursor (ACC) and abscisic acid content was determined using an  
289 enzyme-linked immunosorbent assay (ELISA)(Yang *et al.*, 2001).

## 290 **Statistical analysis**

291 All experiments with each group were performed at least in triplicate. Data were reported as mean  $\pm$  SD.  
292 All data were analysed by Graphpad Prism 6.01 software by the t test to assess significant differences among  
293 means.

## 294 **ACKNOWLEDGMENTS**

295 This work was supported by grants from the Major Project of New Varieties Cultivation of Genetically Modified  
296 Organisms (2016ZX08004002-007), the National Natural Science Foundation of China (31771816, 31971965), the Special  
297 Supervision on Quality and Safety of Agricultural Products of the Ministry of Agriculture and Rural Areas (4100-C17106,  
298 21301091702101); the Key Projects of International Scientific and Technological Innovation Cooperation among  
299 Governments under National Key R & D Plan (2018YFE0116900), the China Agricultural Research System (CARS-04-  
300 PS09), the Key-Area Research and Development Program of Guangdong Province (2020B020220008) and the Project of  
301 Science and Technology of Guangzhou (201804020015)

## 302 **AUTHOR CONTRIBUTIONS**

303 Q.M., H.N. and L.L. conceived and designed of the study. L.L., X.L., C.Y., Y.C. and Z.C. conducted the experiment.  
304 L.L., X.L., and Q.M. performed data as well as statistical analysis. L.L. wrote the manuscript which was reviewed and  
305 edited by X.L., H.N. and Q.M.

## 306 **CONFLICT of INTEREST**

307 The authors declare that they have no competing interests.

## REFERENCES

- Bolt S, Zuther E, Zintl S, *et al.*. ERF105 is a transcription factor gene of *Arabidopsis thaliana* required for freezing tolerance and cold acclimation[J]. *Plant, Cell & Environment*, 2017,40(1):108-120.
- Chen J, Wang X, Zhang W, *et al.*. Protein phosphatase 2A alleviates cadmium toxicity by modulating ethylene production in *Arabidopsis thaliana*[J]. *Plant, Cell & Environment*, 2020,43(4):1008-1022.
- Clough S J. Floral dip : A simplified method for *Agrobacterium*-mediated transformation of *Arabidopsis thaliana*[J]. *Plant Journal*, 2010,16(6):735-743.
- Dong L, Cheng Y, Wu J, *et al.*. Overexpression of *GmERF5*, a new member of the soybean EAR motif-containing ERF transcription factor, enhances resistance to *Phytophthora sojae* in soybean [J]. *Journal of Experimental Botany*, 2015,66(9):2635-2647.
- Finkelstein R R, Lynch T J. The *Arabidopsis* abscisic acid response gene *ABI5* encodes a basic leucine zipper transcription factor[J]. *Plant Cell*, 2000,12(4):599-609.
- Finkelstein R R, Wang M L, Lynch T J, *et al.*. The *Arabidopsis* abscisic acid response locus *ABI4* encodes an APETALA2 domain protein[J]. *The Plant Cell*, 1998,10(6):1043-1054.
- Guo W, Zhao J, Li X, *et al.*. A soybean  $\beta$ -expansin gene *GmEXPB2* intrinsically involved in root system architecture responses to abiotic stresses[J]. *The Plant Journal*, 2011,66(3):541-552.
- Hu Y, Zhao L, Chong K, *et al.*. Overexpression of *OsERF1*, a novel rice ERF gene, up-regulates ethylene-responsive genes expression besides affects growth and development in *Arabidopsis* [J]. *Journal of Plant Physiology*, 2008,165(16):1717-1725.
- Jin Y, Pan W, Zheng X, *et al.*. OsERF101, an ERF family transcription factor, regulates drought stress response in reproductive tissues[J]. *Plant Molecular Biology*, 2018,98(1-2):51-65.
- Jung H, Chung P J, Park S, *et al.*. Overexpression of *OsERF48* causes regulation of *OsCML16*, a calmodulin-like protein gene that enhances root growth and drought tolerance[J]. *Plant Biotechnology Journal*, 2017,15(10):1295-1308.
- Klay I, Gouia S, Liu M, *et al.*. Ethylene response factors (ERF) are differentially regulated by different abiotic stress types in tomato plants[J]. *Plant Science*, 2018,274:137-145.
- Kochian L V. Cellular mechanisms of aluminum toxicity and resistance in plants[J]. *Annual Review of Plant Physiology & Plant Molecular Biology*, 1995,46:237-260.
- Ku Y, Sintaha M, Cheung M, *et al.*. Plant hormone signaling crosstalks between biotic and abiotic stress responses[J]. *International Journal of Molecular Sciences*, 2018,19(10):3206.
- Lee S Y, Hwang E Y, Seok H Y, *et al.*. *Arabidopsis* AtERF71/HRE2 functions as transcriptional activator via cis-acting GCC box or DRE/CRT element and is involved in root development through regulation of root cell expansion[J]. *Plant Cell Reports*, 2015,34(2):223-231.
- Li J, Guo X, Zhang M, *et al.*. OsERF71 confers drought tolerance via modulating ABA signaling and proline biosynthesis[J]. *Plant Science*, 2018,270:131-139.
- Li W, Wang C, Shi H, *et al.*. Genome-wide analysis of ethylene-response factor family in adzuki bean and functional determination of VaERF3 under saline-alkaline stress[J]. *Plant Physiology and Biochemistry*, 2020,147:215-222.
- Liu Q, Kasuga M, Sakuma Y, *et al.*. Two transcription factors, DREB1 and DREB2, with an EREBP/AP2 DNA binding domain separate two cellular signal transduction pathways in drought- and low-temperature-responsive gene expression, respectively, in *Arabidopsis*[J]. *Plant Cell*, 1998,10(8):1391-1406.
- Livak K J, Schmittgen T D. Analysis of relative gene expression data using Real-Time quantitative PCR and the  $2^{-\Delta\Delta CT}$

- method[J]. *Methods*, 2001,25(4):402-408.
- Msanne J, Lin J, Stone J M, *et al.*. Characterization of abiotic stress-responsive *Arabidopsis thaliana* RD29A and RD29B genes and evaluation of transgenes[J]. *Planta*, 2011,234(1):97-107.
- Ohme-Takagi M, Shinshi H. Ethylene-inducible DNA binding proteins that interact with an ethylene-responsive element[J]. *Plant Cell*, 1995,7(2):173-182.
- Oñate-Sánchez L, Anderson J P, Young J, *et al.*. AtERF14, a member of the ERF family of transcription factors, plays a nonredundant role in plant defense[J]. *Plant Physiology*, 2007,143(1):400-409.
- Riechmann J L, Meyerowitz E M. The AP2/EREBP family of plant transcription factors[J]. *Biological Chemistry*, 1998,379(6):633-646.
- Rincón M, Gonzales R A. Aluminum partitioning in intact roots of aluminum-tolerant and aluminum-sensitive wheat (*Triticum aestivum* L.) Cultivars[J]. *Plant Physiology*, 1992,99(3):1021-1028.
- Scarpeci T E, Frea V S, Zanor M I, *et al.*. Overexpression of AtERF019 delays plant growth and senescence and improves drought tolerance in *Arabidopsis*[J]. *Journal of Experimental Botany*, 2016:w429.
- Seo Y J, Park J, Cho Y, *et al.*. Overexpression of the ethylene-responsive factor gene BrERF4 from *Brassica rapa* increases tolerance to salt and drought in *Arabidopsis* plants[J]. *Molecules and Cells*, 2010,30(3):271-277.
- Shinozaki K Y A K. A novel cis-acting element in an *Arabidopsis* gene is involved in responsiveness to drought, low temperature, or high-salt stress[J]. *Laboratory of Plant Molecular Biology*, 1994(6):251-264.
- Sparkes I A, Runions J, Kearns A, *et al.*. Rapid, transient expression of fluorescent fusion proteins in tobacco plants and generation of stably transformed plants[J]. *Nature Protocols*, 2006,1(4):2019-2025.
- Sun X, Zhang L, Wong D C J, *et al.*. The ethylene response factor VaERF092 from Amur grape regulates the transcription factor VaWRKY33, improving cold tolerance[J]. *The Plant Journal*, 2019.
- Uexküll H R V, Mutert E. Global extent, development and economic impact of acid soils[J]. *Plant and Soil*, 1995,171(1):1-15.
- Wang J, Raman H, Zhang G, *et al.*. Aluminium tolerance in barley (*Hordeum vulgare* L.): Physiological mechanisms, genetics and screening methods[J]. *Journal of Zhejiang University SCIENCE B*, 2006,7(10):769-787.
- Wang X, Liu S, Tian H, *et al.*. The small ethylene response factor ERF96 is involved in the regulation of the abscisic acid response in *arabidopsis*[J]. *Frontiers in Plant Science*, 2015,6.
- Wessels B, Seyfferth C, Escamez S, *et al.*. An AP2/ERF transcription factor ERF139 coordinates xylem cell expansion and secondary cell wall deposition[J]. *New Phytologist*, 2019,224(4):1585-1599.
- Xing L, Di Z, Yang W, *et al.*. Overexpression of ERF1-V from *haynaldia villosa* can enhance the resistance of wheat to powdery mildew and increase the tolerance to salt and drought stresses[J]. *Frontiers in Plant Science*, 2017,8.
- Yang J, Zhang J, Wang Z, *et al.*. Hormonal changes in the grains of rice subjected to water stress during grain filling1[J]. *Plant Physiology*, 2001,127(1):315-323.
- Yu F, Liang K, Fang T, *et al.*. A group VII ethylene response factor gene, *ZmEREB180*, coordinates waterlogging tolerance in maize seedlings[J]. *Plant Biotechnology Journal*, 2019,17(12):2286-2298.
- Yu Y, Duan X, Ding X, *et al.*. A novel AP2/ERF family transcription factor from *Glycine soja*, GsERF71, is a DNA binding protein that positively regulates alkaline stress tolerance in *Arabidopsis*[J]. *Plant Molecular Biology*, 2017,94(4-5):509-530.
- Yu Y, Liu A, Duan X, *et al.*. GsERF6, an ethylene-responsive factor from *Glycine soja*, mediates the regulation of plant bicarbonate tolerance in *Arabidopsis*[J]. *Planta*, 2016,244(3):681-698.
- Yu Y, Yang D, Zhou S, *et al.*. The ethylene response factor OsERF109 negatively affects ethylene biosynthesis and drought tolerance in rice[J]. *Protoplasma*, 2017,254(1):401-408.

- Zeng Q, Yang C, Ma Q, *et al.*. Identification of wild soybean miRNAs and their target genes responsive to aluminum stress[J]. *Bmc Plant Biology*, 2012,12(1):182.
- Zhai Y, Wang Y, Li Y, *et al.*. Isolation and molecular characterization of GmERF7, a soybean ethylene-response factor that increases salt stress tolerance in tobacco[J]. *Gene*, 2013,513(1):174-183.
- Zhang G, Chen M, Chen X, *et al.*. Phylogeny, gene structures, and expression patterns of the ERF gene family in soybean (*Glycine max* L.)[J]. *Journal of Experimental Botany*, 2008,59(15):4095-4107.
- Zhang G, Chen M, Li L, *et al.*. Overexpression of the soybean *GmERF3* gene, an AP2/ERF type transcription factor for increased tolerances to salt, drought, and diseases in transgenic tobacco[J]. *Journal of Experimental Botany*, 2009,60(13):3781-3796.
- Zhang H. Arabidopsis AtERF15 positively regulates immunity against *Pseudomonas syringae* pv. Tomato DC3000 and Botrytis cinerea[J]. *Frontiers in Plant Science*, 2015,6.
- Zhang J, Xu H, Wang N, *et al.*. The ethylene response factor MdERF1B regulates anthocyanin and proanthocyanidin biosynthesis in apple[J]. *Plant Molecular Biology*, 2018,98(3):205-218.
- Zhao M, Yin L, Liu Y, *et al.*. The ABA-induced soybean ERF transcription factor gene *GmERF75* plays a role in enhancing osmotic stress tolerance in Arabidopsis and soybean[J]. *Bmc Plant Biology*, 2019,19(1).
- Zhao M, Yin L, Ma J, *et al.*. The roles of GmERF135 in improving salt tolerance and decreasing ABA sensitivity in soybean[J]. *Frontiers in Plant Science*, 2019,10.
- Zhao Y, Chang X, Qi D, *et al.*. A novel soybean ERF transcription factor, GmERF113, increases resistance to phytophthora sojae infection in soybean[J]. *Frontiers in Plant Science*, 2017,8.
- Zheng X, Xing J, Zhang K, *et al.*. Ethylene response factor ERF11 Activates BT4 transcription to regulate immunity to *Pseudomonas syringae*[J]. *Plant Physiology*, 2019,180(2):1132-1151.

## SUPPORTING INFORMATIONS



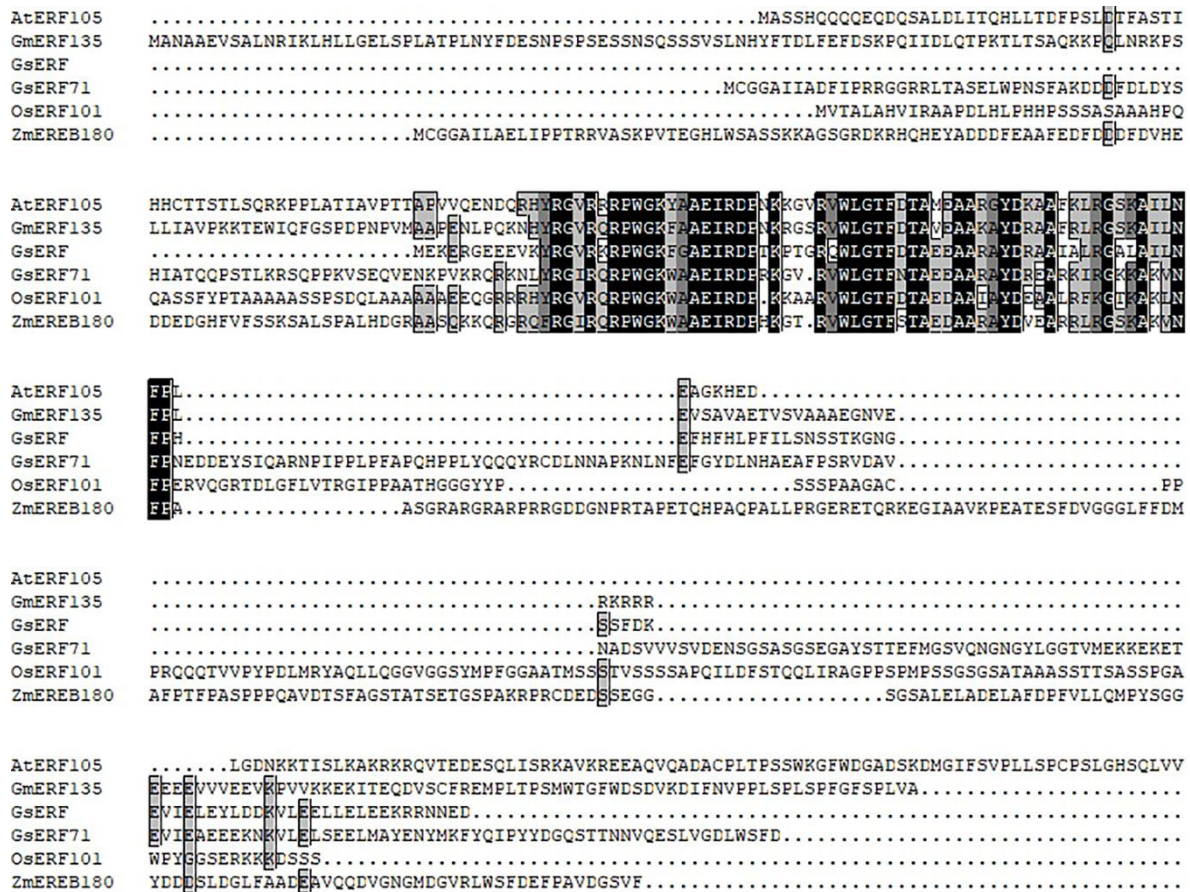

Figure 1. Sequence alignment of AP2 domain by DNAMAN. The shaded part of the figure is the AP2 domain. The protein sequences of the selected ERF genes were obtained from Phytosome or Genbank, the Accession Numbers were shown follows: AtERF105 (NP\_568755.1), GmERF135 (Glyma.17G145300), OsERF71 (XP\_015643752.1), OsERF101 (Os04g32620), ZmEREB180 (NC\_024459.2).

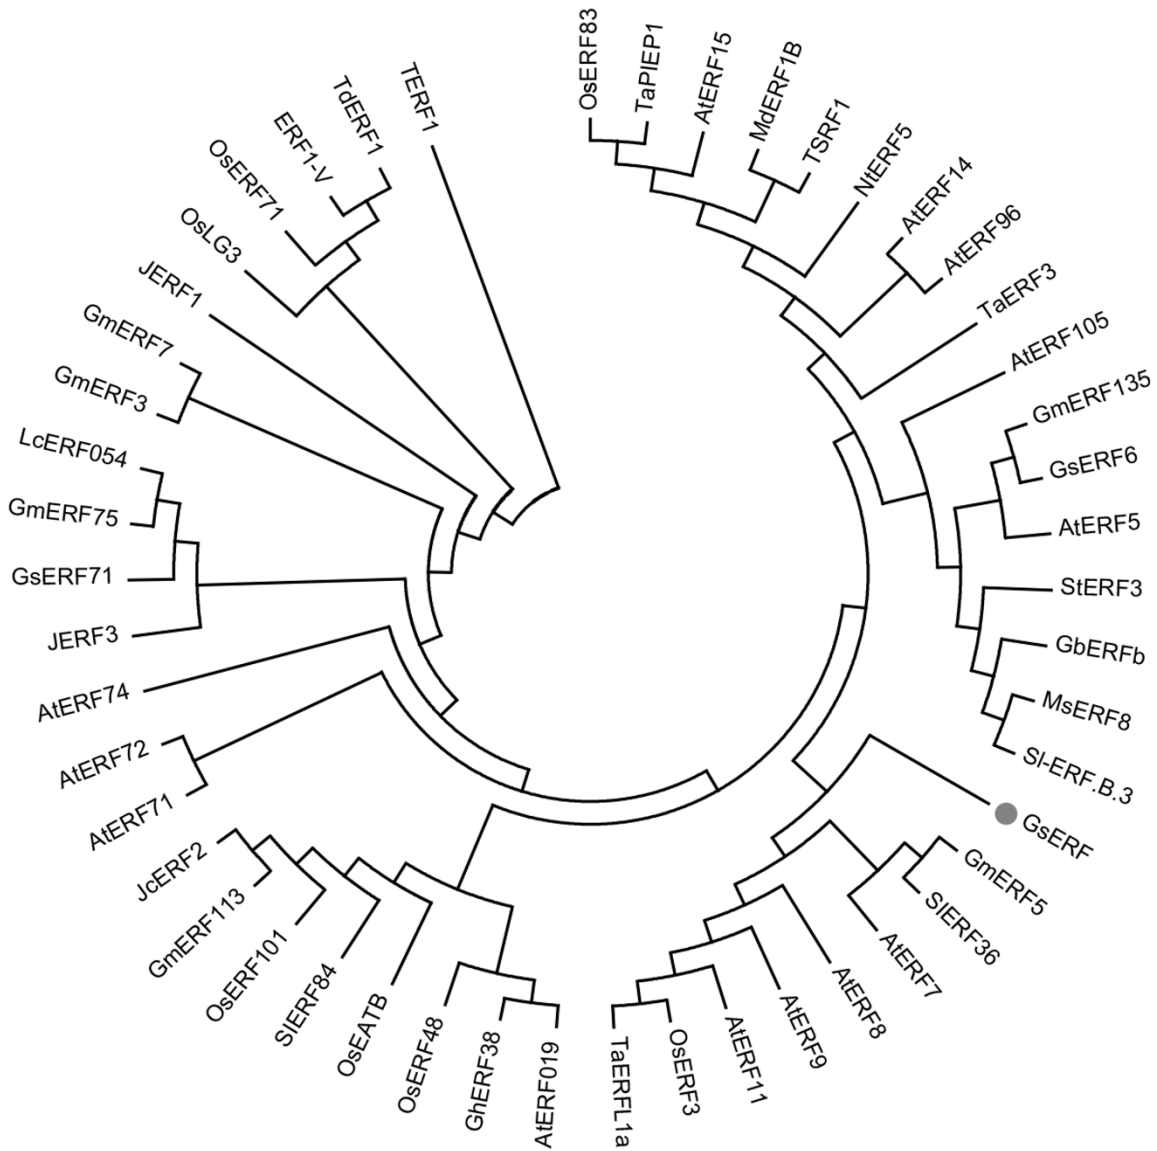

Figure 2. Phylogenetic relationship was constructed with 48 transcription factors of the ERF family associated with stress resistance. The protein sequences of the selected ERF genes were obtained from Phytozome or Genebank, the Accession Numbers were shown in the supplementary material.

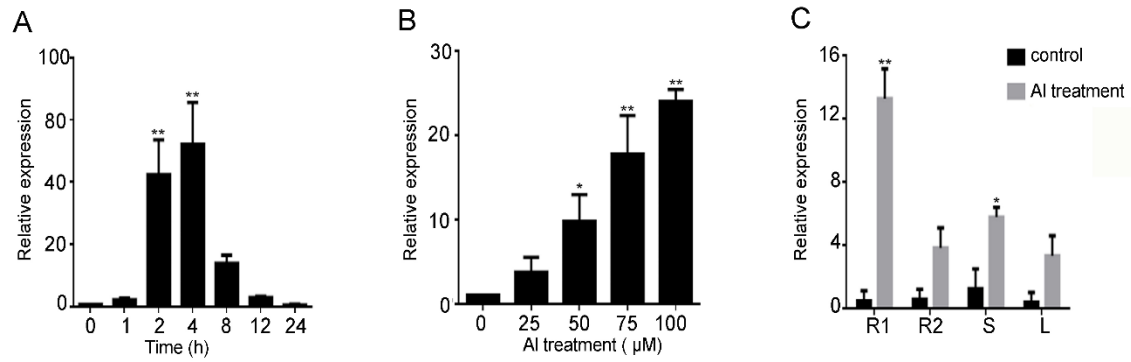

Figure 3. Expression patterns of *GsERF* were detected in different tissues and under  $\text{AlCl}_3$  treatments.

A, *GsERF* expression in roots exposed to 30  $\mu\text{M}$   $\text{AlCl}_3$  for 0 to 24 h. B, *GsERF* expression in roots exposed to 0 to 100  $\mu\text{M}$   $\text{AlCl}_3$  for 6 h.

C, *GsERF* expression in soybean root apices (R1, 0-1cm), root apices (R2, 0-2cm), stems (S) and leaves (L) in the absence or presence of Al stress. Values are means  $\pm$  SD (n = 3). Asterisks show significant differences between control and Al treatments using student's t-

test: \*,  $P < 0.05$ ; \*\*,  $P < 0.01$ .

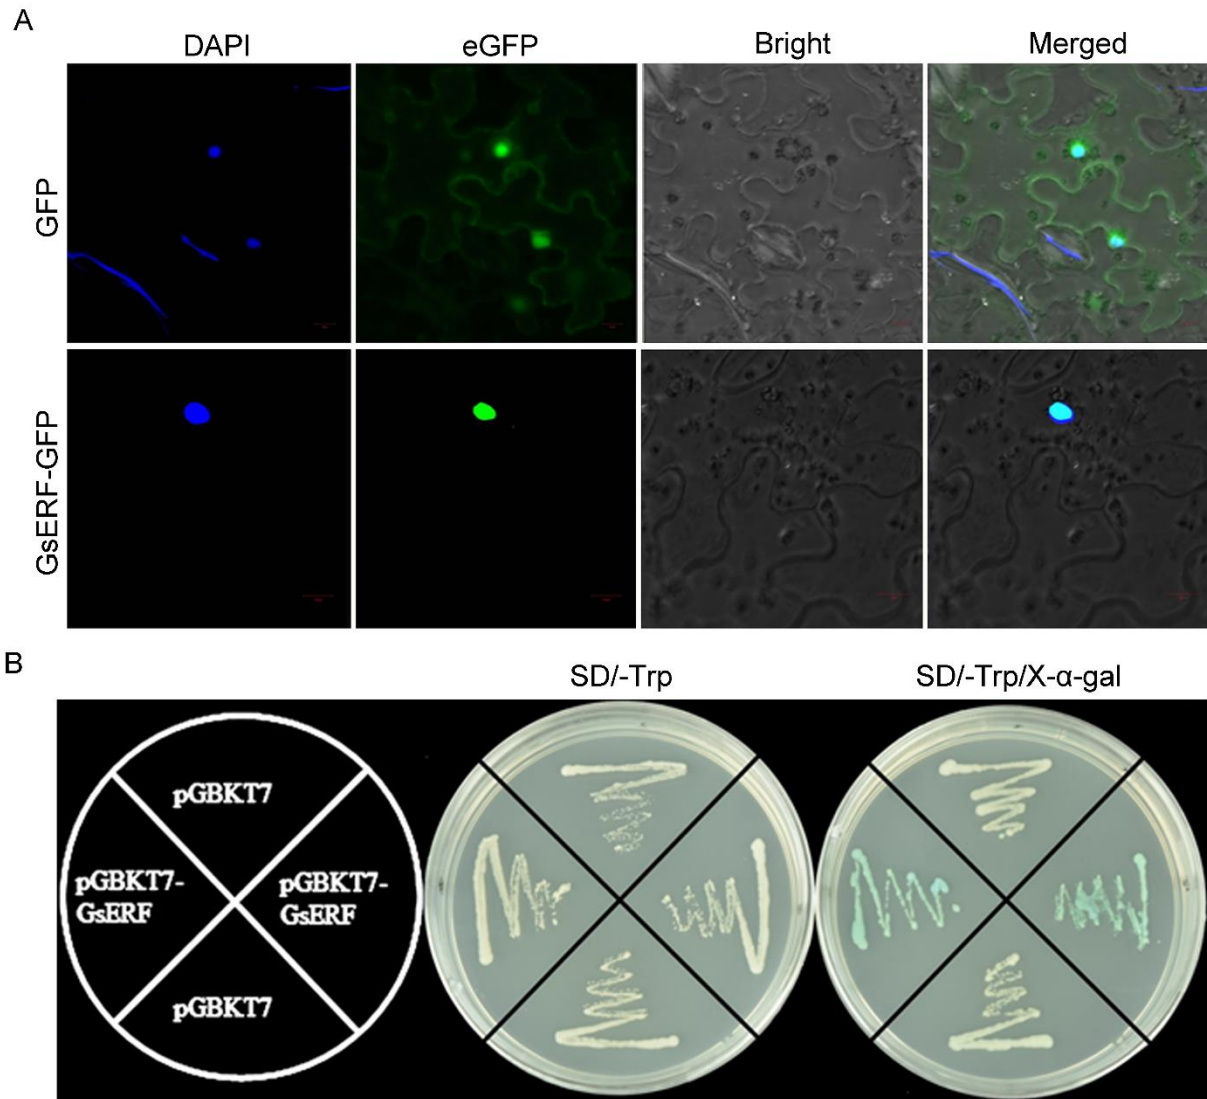

Figure 4. GsERF protein is localized in the nucleus and possesses transactivation activity.

A, Nuclear localization of the GsERF protein in leaf epidermis cells of *Nicotiana benthamiana*. *Nicotiana benthamiana* leaves transiently expressing GFP alone (upper) and GsERF-GFP (bottom) proteins were observed with a confocal microscope (厂家, 生产国家). B, Transactivation assay of the truncated GsERF proteins. Full-length of GsERF were fused with the GAL4 DNA-binding domain and then expressed in yeast strain Y2H gold. The transformed yeast cells were plated and grown on control plates (SD/-Trp) or selective plates (SD/-Trp +X- $\alpha$ -gal).

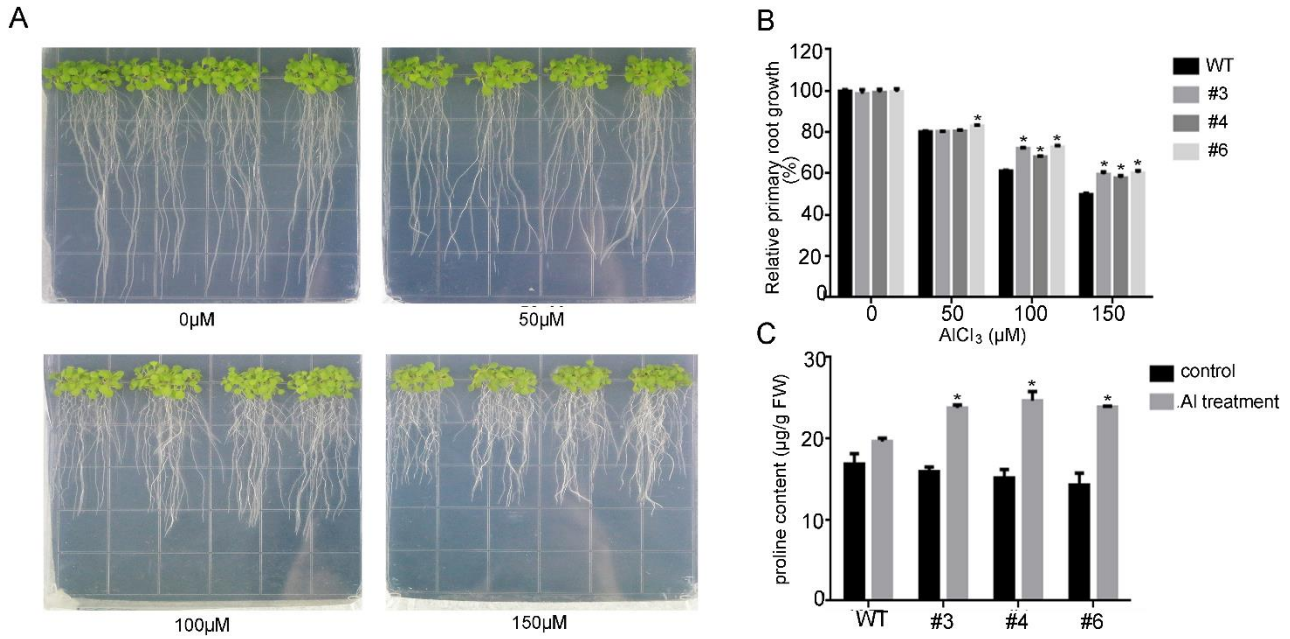

**Figure 5.** GsERF enhanced the resistance of Arabidopsis plants to Al stress.

A, The root growth of wild type and GsERF overexpression Arabidopsis with or without Al treatment. B, The relative root length growth was calculated. C, The free proline contents in wild type and GsERF overexpression Arabidopsis. Data are mean values  $\pm$  SD (\* $P < 0.05$ ; Student's t-test). All experiments described earlier were carried out with three biological repetitions.

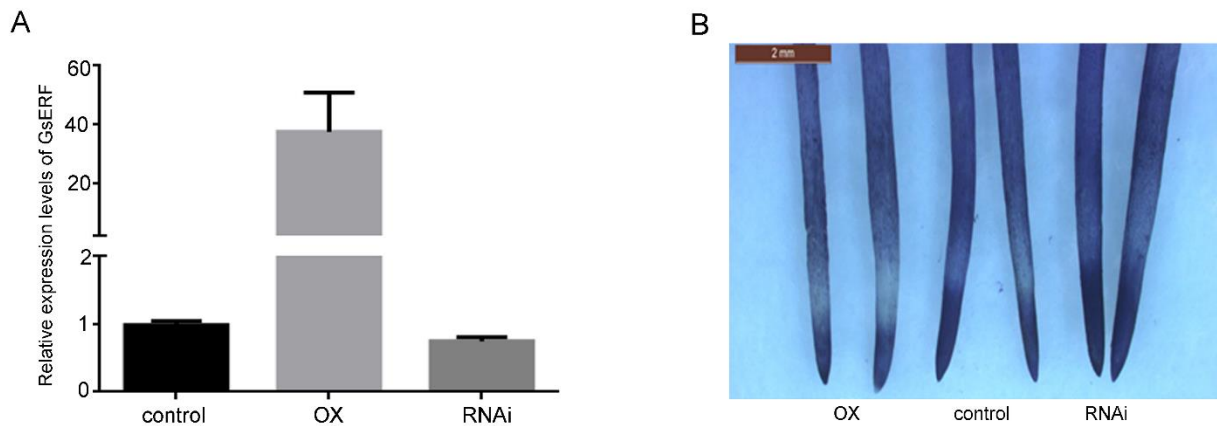

**Figure 6.** The root tip staining phenotype of hairy roots.

A, the expression level of *GsERF* in the control, OX-*GsERF* and RNAi-*GsERF* hairy roots. B, the control, OX-*GsERF* and RNAi-*GsERF* hairy roots were stained with hematoxylin dye after Al treatment. The control, OX- *GsERF* and RNAi- *GsERF* hairy roots were treated with 50  $\mu$ M AlCl<sub>3</sub> for 12 h. Data are mean values  $\pm$  SD, all experiments described earlier were carried out with three biological repetitions.



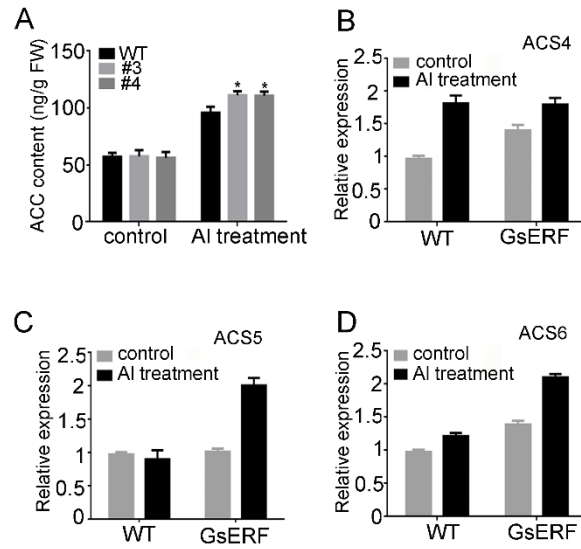

**Figure 7.** ACC content and the expression of ACC biosynthesis genes in GsERF-overexpressing and wild type Arabidopsis.

A, ACC contents in GsERF-overexpressing and wild type Arabidopsis under control and AI treatment conditions. B-D, Real-time PCR analysis of the expression of ACC biosynthesis genes under control and AI treatment conditions. Data are mean values  $\pm$  SD (\* $P < 0.05$ ; Student's t-test). Error bars represent the standard error of three replicates. WT: wild type. #3 and #4: transgenic lines of GsERF in T3 generation.

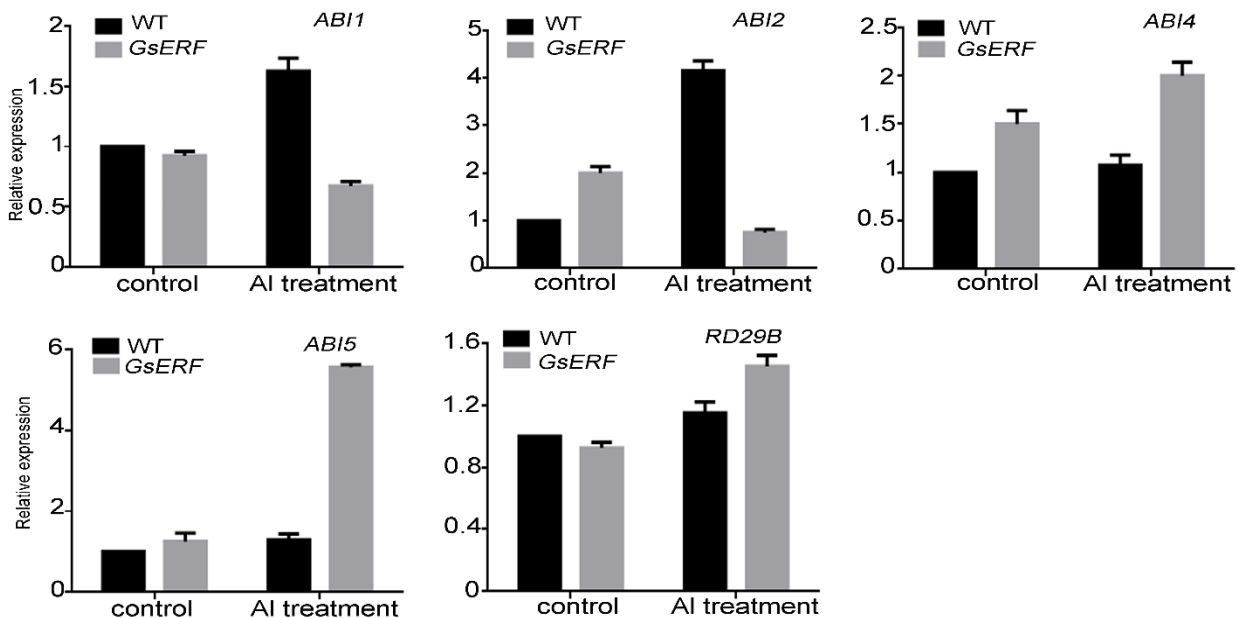

**Figure 8.** Expression levels of ABA transport-related genes in GsERF-overexpressing and wild type Arabidopsis. Seedlings with approximately 1-cm roots were grown in agar medium containing 0 or 150 mM  $AlCl_3$  for 10 days. Error bars indicate standard error of the means (SD) based on three technical replicates. Data are mean values  $\pm$  SD.
